# Supplementary material for: A Survey on Vaccination and Disease Occurrence in Municipal and Non-Profit Animal Shelters in Portugal
Source: MDPI journal article supplement (doi:10.3390/ani13172723), 2023-08-27
Supplement: s1 [file s1]

## Instructions to fill questionnaire

### Subject: Request for disclosure of questionnaire

ANVETEM

<https://anvetem.wordpress.com>

Email: geral.anvetem@gmail.com

Dear President of ANVETEM

Within the scope of Shelter Veterinary Medicine, and with the aim to characterize the situation of animal shelters in Portugal, a questionnaire was developed by Municipal Veterinarians and Researchers from the do Instituto de Ciências Biomédicas Abel Salazar (ICBAS) of the University of Porto. In this context, we would like to request your collaboration in its disclosure by your associates.

The questionnaire must be completed by the Veterinarian responsible for the Official Animal Collection Center/Municipal Kennel, with only one response per institution. It takes approximately 30 minutes to complete and is available electronically until March 31st: <https://inqueritos.up.pt/index.php?r=survey/index&sid=492317&lang=pt> Participation is voluntary and anonymous. The data collected will be treated in accordance with the Data Protection Law. The study was approved by the Ethics Committee of ICBAS, University of Porto, under number 2020/CE/P022.

Thank you in advance for your availability and collaboration in disseminating this questionnaire.

Best regards,

The Shelter Veterinary Medicine group

Adélia Alves Pereira  
Alexandra Müller  
Cláudia Baptista  
Eduarda Gomes Neves  
Pedro Osório  
Sara Marques

For additional questions:

Alexandra Müller - [ammuller@icbas.up.pt](mailto:ammuller@icbas.up.pt)

Adélia Alves Pereira - [adeliamedicina.abrigo@gmail.com](mailto:adeliamedicina.abrigo@gmail.com)

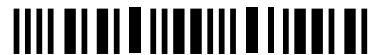

## Section A: I. GENERAL INFORMATION

**A1. Are you a Veterinarian?**

|     |                          |
|-----|--------------------------|
| Yes | <input type="checkbox"/> |
| No  | <input type="checkbox"/> |

**A2. Do you work at Association/ Animal Shelter?**

|     |                          |
|-----|--------------------------|
| Yes | <input type="checkbox"/> |
| No  | <input type="checkbox"/> |

**A3. What type of Shelter are you responsible for?**

|                                  |                          |
|----------------------------------|--------------------------|
| Non-profit Shelter with Adoption | <input type="checkbox"/> |
| Sanctuary                        | <input type="checkbox"/> |
| Municipal Shelter                | <input type="checkbox"/> |
| Centro de Recolha Oficial        | <input type="checkbox"/> |
| Inter-Municipal Shelter          | <input type="checkbox"/> |
| Other                            | <input type="checkbox"/> |

Other

**A4.**

**According to the map indicate the location of the Shelter:**

*The Autonomous Regions of Madeira and Azores are included in the answers despite not being on the map.*

Source of the image: Wikipédia

|                             |                          |
|-----------------------------|--------------------------|
| Non-response                | <input type="checkbox"/> |
| Minho                       | <input type="checkbox"/> |
| Trás-os-Montes e Alto Douro | <input type="checkbox"/> |
| Douro Litoral               | <input type="checkbox"/> |
| Beira Alta                  | <input type="checkbox"/> |
| Beira Litoral               | <input type="checkbox"/> |
| Beira Baixa                 | <input type="checkbox"/> |
| Extremadura                 | <input type="checkbox"/> |
| Ribatejo                    | <input type="checkbox"/> |
| Alto Alentejo               | <input type="checkbox"/> |
| Baixo Alentejo              | <input type="checkbox"/> |
| Algarve                     | <input type="checkbox"/> |
| Madeira                     | <input type="checkbox"/> |
| Açores                      | <input type="checkbox"/> |

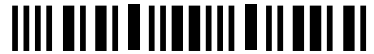

**A9. The shelter is designed to which kind of animals?**

Yes No

Dogs ☐ ☐

Cats ☐ ☐

Other species ☐ ☐

**A10. What is the current number (approximately) of dogs?**

**A11. What is the current number (approximately) of cats?**

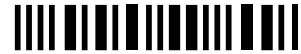

**Section H: VIII. ANIMAL BEHAVIOR**

**H10.     Where animals are assisted, excluding sterilizations?**

|                                                  |                          |
|--------------------------------------------------|--------------------------|
| At the facility, by the responsible veterinarian | <input type="checkbox"/> |
| At a Veterinary Medical Center (CAMV)            | <input type="checkbox"/> |
| At the facility, by an external veterinarian     | <input type="checkbox"/> |
| Other                                            | <input type="checkbox"/> |

Other

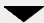



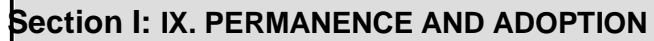[illegible]

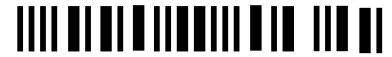

## Section J: X. CLINICAL ASPECTS

**J1. There are individual medical records?**

Yes ☐  
No ☐

**J2. What prophylactic interventions are routinely performed?**

External parasite control ☐  
Internal parasite control ☐  
Vaccination ☐

**J3. Are there financial restrictions for regular application of these prophylactic interventions?**

Yes ☐  
No ☐

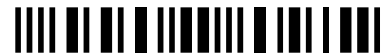

**J4. What vaccines are available for dogs?**

|                     |                          |
|---------------------|--------------------------|
| Rabies              | <input type="checkbox"/> |
| Pentavalent DHPPi+L | <input type="checkbox"/> |
| Kennel cough        | <input type="checkbox"/> |
| Unavailable         | <input type="checkbox"/> |
| Non-applicable      | <input type="checkbox"/> |

**J5. What vaccines are available for cats?**

|                 |                          |
|-----------------|--------------------------|
| Trivalent (RCP) | <input type="checkbox"/> |
| FeLV            | <input type="checkbox"/> |
| Rabies          | <input type="checkbox"/> |
| Unavailable     | <input type="checkbox"/> |
| Non-applicable  | <input type="checkbox"/> |

**J6. At the moment, what is the vaccination coverage of housed animals?**

|      | >80%                     | 50-80 %                  | <50%                     | Non-applicable           |
|------|--------------------------|--------------------------|--------------------------|--------------------------|
| Dogs | <input type="checkbox"/> | <input type="checkbox"/> | <input type="checkbox"/> | <input type="checkbox"/> |
| Cats | <input type="checkbox"/> | <input type="checkbox"/> | <input type="checkbox"/> | <input type="checkbox"/> |

**J7. Regarding the vaccination protocol for puppies and kittens, indicate:**

Are vaccinated repeatedly every 2-4 weeks?  
The last booster of the primary vaccination is given after 16 weeks of age?  
Other

|                          |
|--------------------------|
| <input type="checkbox"/> |
| <input type="checkbox"/> |
| <input type="checkbox"/> |

Other

**J8. Regarding the vaccination protocol for adults, what is the periodicity of revaccination?**

|                 | Annual                   | Every 3 years            | No revaccination         | Non-applicable           |
|-----------------|--------------------------|--------------------------|--------------------------|--------------------------|
| DHPPi+L in dogs | <input type="checkbox"/> | <input type="checkbox"/> | <input type="checkbox"/> | <input type="checkbox"/> |
| RCP in cats     | <input type="checkbox"/> | <input type="checkbox"/> | <input type="checkbox"/> | <input type="checkbox"/> |

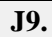

**In dogs, what is the occurrence of the following infectious diseases in the last 12 months?**

*In this survey an "outbreak" is considered to be 2 or more animals affected in the same period.*

|                    | No<br>disease            | 1-2 cases<br>(individual animals)   | >2<br>cases              | at least one known outbreak | un-known                 | Non-applicable           |
|--------------------|--------------------------|-------------------------------------|--------------------------|-----------------------------|--------------------------|--------------------------|
| Canine distemper   | <input type="checkbox"/> | <input checked="" type="checkbox"/> | <input type="checkbox"/> | <input type="checkbox"/>    | <input type="checkbox"/> | <input type="checkbox"/> |
| Parvovirus         | <input type="checkbox"/> | <input checked="" type="checkbox"/> | <input type="checkbox"/> | <input type="checkbox"/>    | <input type="checkbox"/> | <input type="checkbox"/> |
| Canine coronavirus | <input type="checkbox"/> | <input checked="" type="checkbox"/> | <input type="checkbox"/> | <input type="checkbox"/>    | <input type="checkbox"/> | <input type="checkbox"/> |
| Kennel cough       | <input type="checkbox"/> | <input checked="" type="checkbox"/> | <input type="checkbox"/> | <input type="checkbox"/>    | <input type="checkbox"/> | <input type="checkbox"/> |
| Mange              | <input type="checkbox"/> | <input checked="" type="checkbox"/> | <input type="checkbox"/> | <input type="checkbox"/>    | <input type="checkbox"/> | <input type="checkbox"/> |
| Dermatophytosis    | <input type="checkbox"/> | <input checked="" type="checkbox"/> | <input type="checkbox"/> | <input type="checkbox"/>    | <input type="checkbox"/> | <input type="checkbox"/> |

**J10.**

## What are the main diagnostic methods?

|                    | Clinical diagnosis       | Rapid test / laboratory  | Necropsy                 | Non-applicable           |
|--------------------|--------------------------|--------------------------|--------------------------|--------------------------|
| Canine distemper   | <input type="checkbox"/> | <input type="checkbox"/> | <input type="checkbox"/> | <input type="checkbox"/> |
| Parvovirus         | <input type="checkbox"/> | <input type="checkbox"/> | <input type="checkbox"/> | <input type="checkbox"/> |
| Canine coronavirus | <input type="checkbox"/> | <input type="checkbox"/> | <input type="checkbox"/> | <input type="checkbox"/> |
| Kennel cough       | <input type="checkbox"/> | <input type="checkbox"/> | <input type="checkbox"/> | <input type="checkbox"/> |

**J11.**

**In cats, what is the occurrence of the following infectious diseases in the last 12 months?**

*In this survey an "outbreak" is considered to be 2 or more animals affected in the same period..*

[illegible]

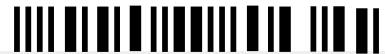

**J12. What are the main diagnostic methods?**

|                               | Clinical<br>diagnosis    | Rapid test/<br>laboratory | Necro<br>psy             | Non-<br>applicable       |
|-------------------------------|--------------------------|---------------------------|--------------------------|--------------------------|
| Feline panleukopenia          | <input type="checkbox"/> | <input type="checkbox"/>  | <input type="checkbox"/> | <input type="checkbox"/> |
| Cat flu                       | <input type="checkbox"/> | <input type="checkbox"/>  | <input type="checkbox"/> | <input type="checkbox"/> |
| Feline infectious peritonitis | <input type="checkbox"/> | <input type="checkbox"/>  | <input type="checkbox"/> | <input type="checkbox"/> |

**J13. In cats, rapid tests are made for retroviruses?**

|                |                          |
|----------------|--------------------------|
| FIV            | <input type="checkbox"/> |
| FeLV           | <input type="checkbox"/> |
| Not performed  | <input type="checkbox"/> |
| Non-applicable | <input type="checkbox"/> |

**J14. In cats, a positive rapid test result is confirmed by another rapid or laboratory test?**

|                 |                          |
|-----------------|--------------------------|
| FIV             | <input type="checkbox"/> |
| FeLV            | <input type="checkbox"/> |
| No confirmation | <input type="checkbox"/> |
| Non-applicable  | <input type="checkbox"/> |

**Assunto: Pedido de divulgação de questionário**

ANVETEM

<https://anvetem.wordpress.com>

Email: [geral.anvetem@gmail.com](mailto:geral.anvetem@gmail.com)

Ex.mo Senhor

Presidente da ANVETEM

No âmbito da Medicina Veterinária de abrigo, e com o objectivo de caracterizar a situação dos abrigos de animais em Portugal, foi desenvolvido um questionário por Médicos Veterinários Municipais e Investigadores do Instituto de Ciências Biomédicas Abel Salazar (ICBAS) da Universidade do Porto. Neste contexto, vimos solicitar a vossa colaboração na sua divulgação pelos vossos associados.

O questionário deve ser preenchido pelo Médico Veterinário responsável pelo Centro de Recolha Oficial de Animais/Canil Municipal, devendo ocorrer apenas uma resposta por instituição. O seu preenchimento demora aproximadamente 30 minutos e está disponível por via eletrónica até ao dia 31 de Março:

<https://inqueritos.up.pt/index.php?r=survey/index&sid=492317&lang=pt>

A participação é voluntária e anónima. Os dados recolhidos serão tratados de acordo com a Lei de Proteção de Dados. O estudo foi aprovado pela Comissão de Ética do ICBAS, Universidade do Porto, com o número 2020/CE/P022.

Agradecemos, desde já, a disponibilidade e colaboração na divulgação deste questionário.

Com os melhores cumprimentos,

O grupo de Medicina Veterinária de Abrigo

Adélia Alves Pereira

Alexandra Müller

Cláudia Baptista

Eduarda Gomes Neves

Pedro Osório

Sara Marques

Para questões adicionais:

Alexandra Müller - [ammuller@icbas.up.pt](mailto:ammuller@icbas.up.pt)

Adélia Alves Pereira - [adeliamedicina.abrigo@gmail.com](mailto:adeliamedicina.abrigo@gmail.com)

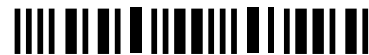

## Secção A: I. INFORMAÇÃO GERAL

**A1. É Médico/a Veterinário?**

Sim

[illegible]

Não

**A2. Trabalha em Alojamento/ Abrigo Animais?**

Sim

[illegible]

Não

**A3. Qual o tipo de Alojamento pelo qual é responsável?**

## Alojamento para Hospedagem sem Fins Lucrativos - com adoção

## Alojamento para Hospedagem sem Fins Lucrativos - santuário

Centro de Recolha Oficial Municipal

Centro de Recolha Oficial Intermunicipal

## Outro

|  |
|--|
|  |
|  |
|  |
|  |
|  |

## Outro

|  |
|--|
|  |
|--|

**A4.**

**De acordo com o mapa supra indique a localização do Abrigo:**

*As Regiões Autónomas da Madeira e Açores estão contempladas nas respostas apesar de não se encontrarem no mapa.*

Fonte da imagem: Wikipédia

Não responde

Minho

Trás-os-Montes e Alto Douro

Douro Litoral

Beira Alta

Beira Litoral

Beira Baixa

Extremadura

Ribatejo

Alto Alentejo

Baixo Alentejo

Algarve

Madeira

Açores

[illegible]



**A9. O alojamento está concebido para que animais?**

Sim Não

Cães ☐ ☐

Gatos ☐ ☐

Outras espécies ☐ ☐

**A10. Qual o número atual (aproximadamente) de cães?**

**A11. Qual o número atual (aproximadamente) de gatos?**



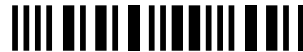

**Secção H: VIII. COMPORTAMENTO ANIMAL**

**H10. Onde são assistidos os animais, excluindo esterilizações?**

- Na instalação, pelo médico veterinário responsável
- Num Centro de Atendimento Médico Veterinário (CAMV)
- Na instalação, por médico veterinário externo
- Outro

|  |
|--|
|  |
|  |
|  |
|  |

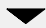

## Seccão I: IX. PERMANÊNCIA E ADOÇÃO

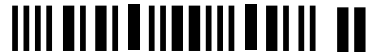

## Secção J: X. ASPECTOS CLÍNICOS

**J1. Existem registos médicos individuais?**

Sim

☐

Não

**J2. Quais as intervenções profiláticas realizadas por rotina?**

Desparasitação externa

☐

Desparasitação interna

☐

Vacinação

☐

**J3. Existem restrições orçamentais para aplicação regular destas intervenções profiláticas?**

Sim

☐

Não

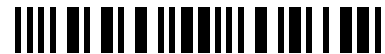

**J4. Quais as vacinas disponíveis para cães?**

|                            |                          |
|----------------------------|--------------------------|
| Raiva                      | <input type="checkbox"/> |
| Pentavalente DHPPi+L       | <input type="checkbox"/> |
| Tosse Canil                | <input type="checkbox"/> |
| Não há vacinas disponíveis | <input type="checkbox"/> |
| Não aplicável              | <input type="checkbox"/> |

**J5. Quais as vacinas disponíveis para gatos?**

|                            |                          |
|----------------------------|--------------------------|
| Trivalente (RCP)           | <input type="checkbox"/> |
| FeLV                       | <input type="checkbox"/> |
| Raiva                      | <input type="checkbox"/> |
| Não há vacinas disponíveis | <input type="checkbox"/> |
| Não aplicável              | <input type="checkbox"/> |

**J6. Neste momento, qual é a cobertura vacinal dos animais alojados?**

|       | >80%                     | 50-80%                   | <50%                     | Não aplicável            |
|-------|--------------------------|--------------------------|--------------------------|--------------------------|
| Cães  | <input type="checkbox"/> | <input type="checkbox"/> | <input type="checkbox"/> | <input type="checkbox"/> |
| Gatos | <input type="checkbox"/> | <input type="checkbox"/> | <input type="checkbox"/> | <input type="checkbox"/> |

**J7. Quanto ao protocolo vacinal de cachorros e gatinhos, indique:**

São vacinados repetidamente a cada 2-4 semanas?  
O último reforço da primovacinação é dado após às 16 semanas de idade?  
Outro

|                          |
|--------------------------|
| <input type="checkbox"/> |
| <input type="checkbox"/> |
| <input type="checkbox"/> |

Outro

**J8. Quanto ao protocolo vacinal de adultos, qual a periodicidade de revacinação?**

|                  | Anual                    | De 3 em 3 anos           | Nenhuma revacinação      | Não aplicável            |
|------------------|--------------------------|--------------------------|--------------------------|--------------------------|
| DHPPi+L nos cães | <input type="checkbox"/> | <input type="checkbox"/> | <input type="checkbox"/> | <input type="checkbox"/> |
| RCP nos gatos    | <input type="checkbox"/> | <input type="checkbox"/> | <input type="checkbox"/> | <input type="checkbox"/> |



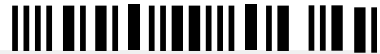

**J12. Quais os principais métodos de diagnóstico?**

|                              | Diagnóstico clínico      | Teste rápido/laboratorial | Necropsia                | Não aplicável            |
|------------------------------|--------------------------|---------------------------|--------------------------|--------------------------|
| Panleucopenia felina         | <input type="checkbox"/> | <input type="checkbox"/>  | <input type="checkbox"/> | <input type="checkbox"/> |
| Coriza                       | <input type="checkbox"/> | <input type="checkbox"/>  | <input type="checkbox"/> | <input type="checkbox"/> |
| Peritonite infecciosa felina | <input type="checkbox"/> | <input type="checkbox"/>  | <input type="checkbox"/> | <input type="checkbox"/> |

**J13. Nos gatos são realizados testes rápidos para retrovirus?**

|                    |                          |
|--------------------|--------------------------|
| FIV                | <input type="checkbox"/> |
| FeLV               | <input type="checkbox"/> |
| Não são realizados | <input type="checkbox"/> |
| Não aplicável      | <input type="checkbox"/> |

**J14. Nos gatos, um resultado positivo de teste rápido é confirmado por outro teste rápido ou laboratorial?**

|                    |                          |
|--------------------|--------------------------|
| FIV                | <input type="checkbox"/> |
| FeLV               | <input type="checkbox"/> |
| Não há confirmação | <input type="checkbox"/> |
| Não aplicável      | <input type="checkbox"/> |
